# Supplementary material for: Fabrication of Guided Tissue Regeneration Membrane Using Lignin-Mediated ZnO Nanoparticles in Biopolymer Matrix for Antimicrobial Activity
Source: Front Chem. 2022 Apr 19;10:837858. doi: 10.3389/fchem.2022.837858 (PMC9063929; doi:10.3389/fchem.2022.837858)
Supplement: Supplementary file 1 [file DataSheet1.docx]

Fabrication of Guided Tissue Regeneration Membrane Using Lignin Mediated ZnO Nanoparticles in Biopolymer Matrix for Antimicrobial Activity

Bushra Bilala‡, Rimsha Niazib‡, Sohail Nadeemb, Muhammad Asim Faridc, Muhammad Shahid Nazira, Toheed Akhtarb, Mohsin Javaidb, Aysha Mohyuddinb, Zulfiqar Alid, Syed Ali Raza Naqvie*, Nawshad Muhammadf*, Sadaf Ul Hassanab*

Bushra Bilala‡, Rimsha Niazib‡, Sohail Nadeemb, Muhammad Asim Faridc, Muhammad Shahid Nazira, Toheed Akhtarb, Mohsin Javaidb, Aysha Mohyuddinb, Zulfiqar Alid, Syed Ali Raza Naqvie*, Nawshad Muhammadf*, Sadaf Ul Hassanab*, Eslam B. Elkaeedg, Hala A. Ibrahiumh, i Nasser S. Awwadj

aDepartment of Chemistry, COMSATS University Islamabad, Lahore Campus, 54000, Pakistan.

bDepartment of Chemistry, School of Sciences, University of Management and Technology, Lahore Campus, Pakistan.

cDepartment of Chemistry, Division of Science and Technology, University of Education, Vehari campuse, Pakistan.

dDepartment of Chemical Engineering, COMSATS University Islamabad, Lahore Campus, 54000, Pakistan.

eDepartment of Chemistry, Government College University, Faisalabad, Pakistan.

fDepartment of Dental Materials, Institute of Basic Medical Sciences, Khyber Medical University, Peshawar, Pakistan

gDepartment of Pharmaceutical Sciences, College of Pharmacy, Almaarefa University, Ad Diriyah 13713, Riyadh, Saudi Arabia.

hBiology Department, Faculty of Science, King Khalid University, P.O. Box 9004, Abha 61413, Saudi Arabia.

iDepartment of Semi Pilot Plant, Nuclear Materials Authority, P.O. Box 530, El Maadi, Egypt.

jChemistry Department, Faculty of Science, King Khalid University, P.O. Box 9004, Abha 61413, Saudi Arabia.

*Corresponding Authors: [drarnaqvi@gmail.com](mailto:drarnaqvi@gmail.com) (Syed Ali Raza Naqvi); [sadaf.hassan@umt.edu.pk](mailto:sadaf.hassan@umt.edu.pk) (Sadaf Ul Hassan); [nawshad.ibms@kmu.edu.pk](mailto:nawshad.ibms@kmu.edu.pk) (Nawshad Muhammad)


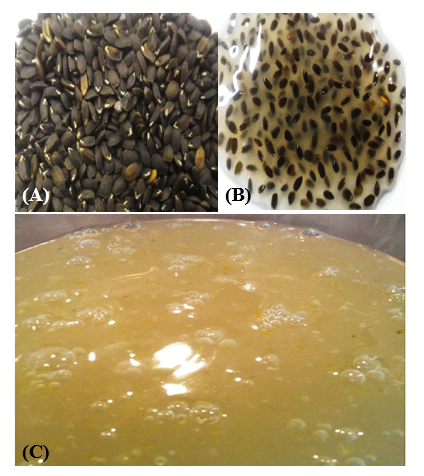


**Figure S1.** Chia seeds (A) before swelling in water (B) swelling in water (C) after extraction.


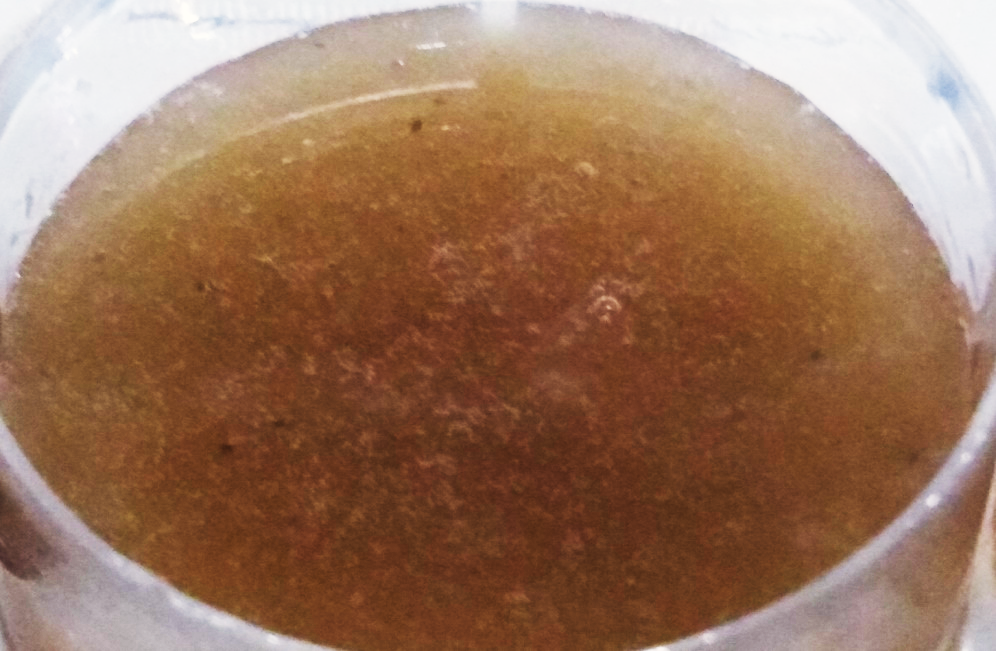


**Figure S2.** Membrane before drying.


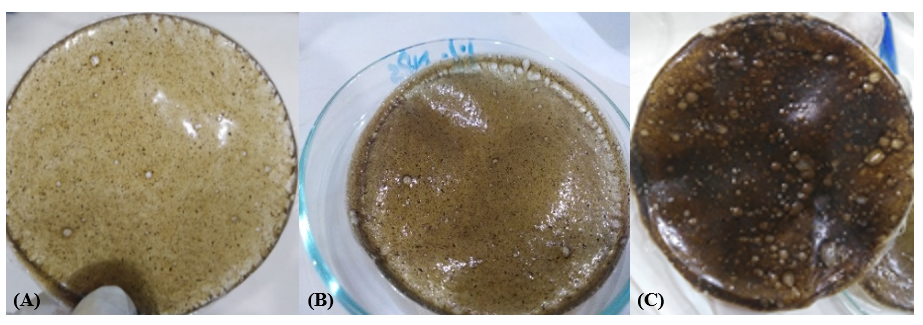


**Figure S3.** Prepared membranes after drying (A) membrane having 1% of lignin mediated zinc oxide nanoparticles (B) membrane having 2.5% nanoparticles (C) membrane having 5% of lignin mediated zinc oxide nanoparticles


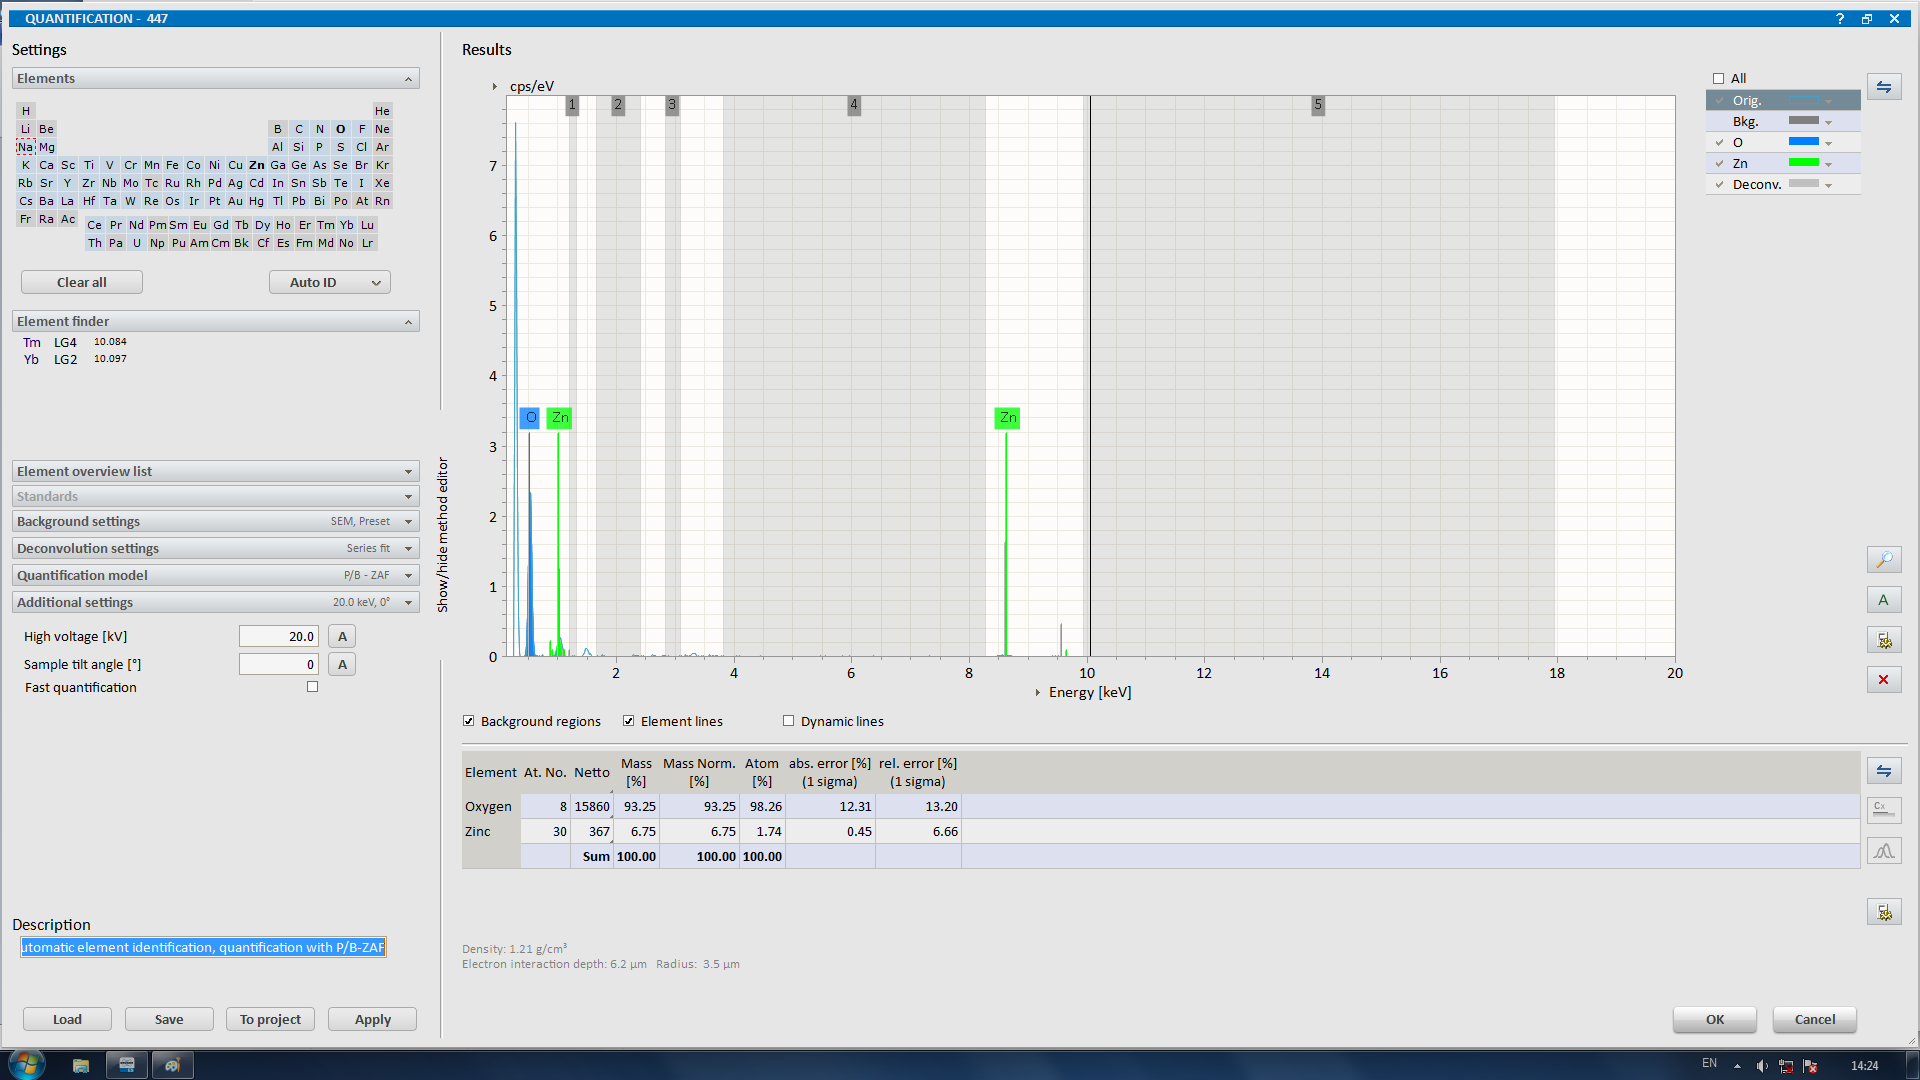


**Figure S4.** EDX of ZnO NP.


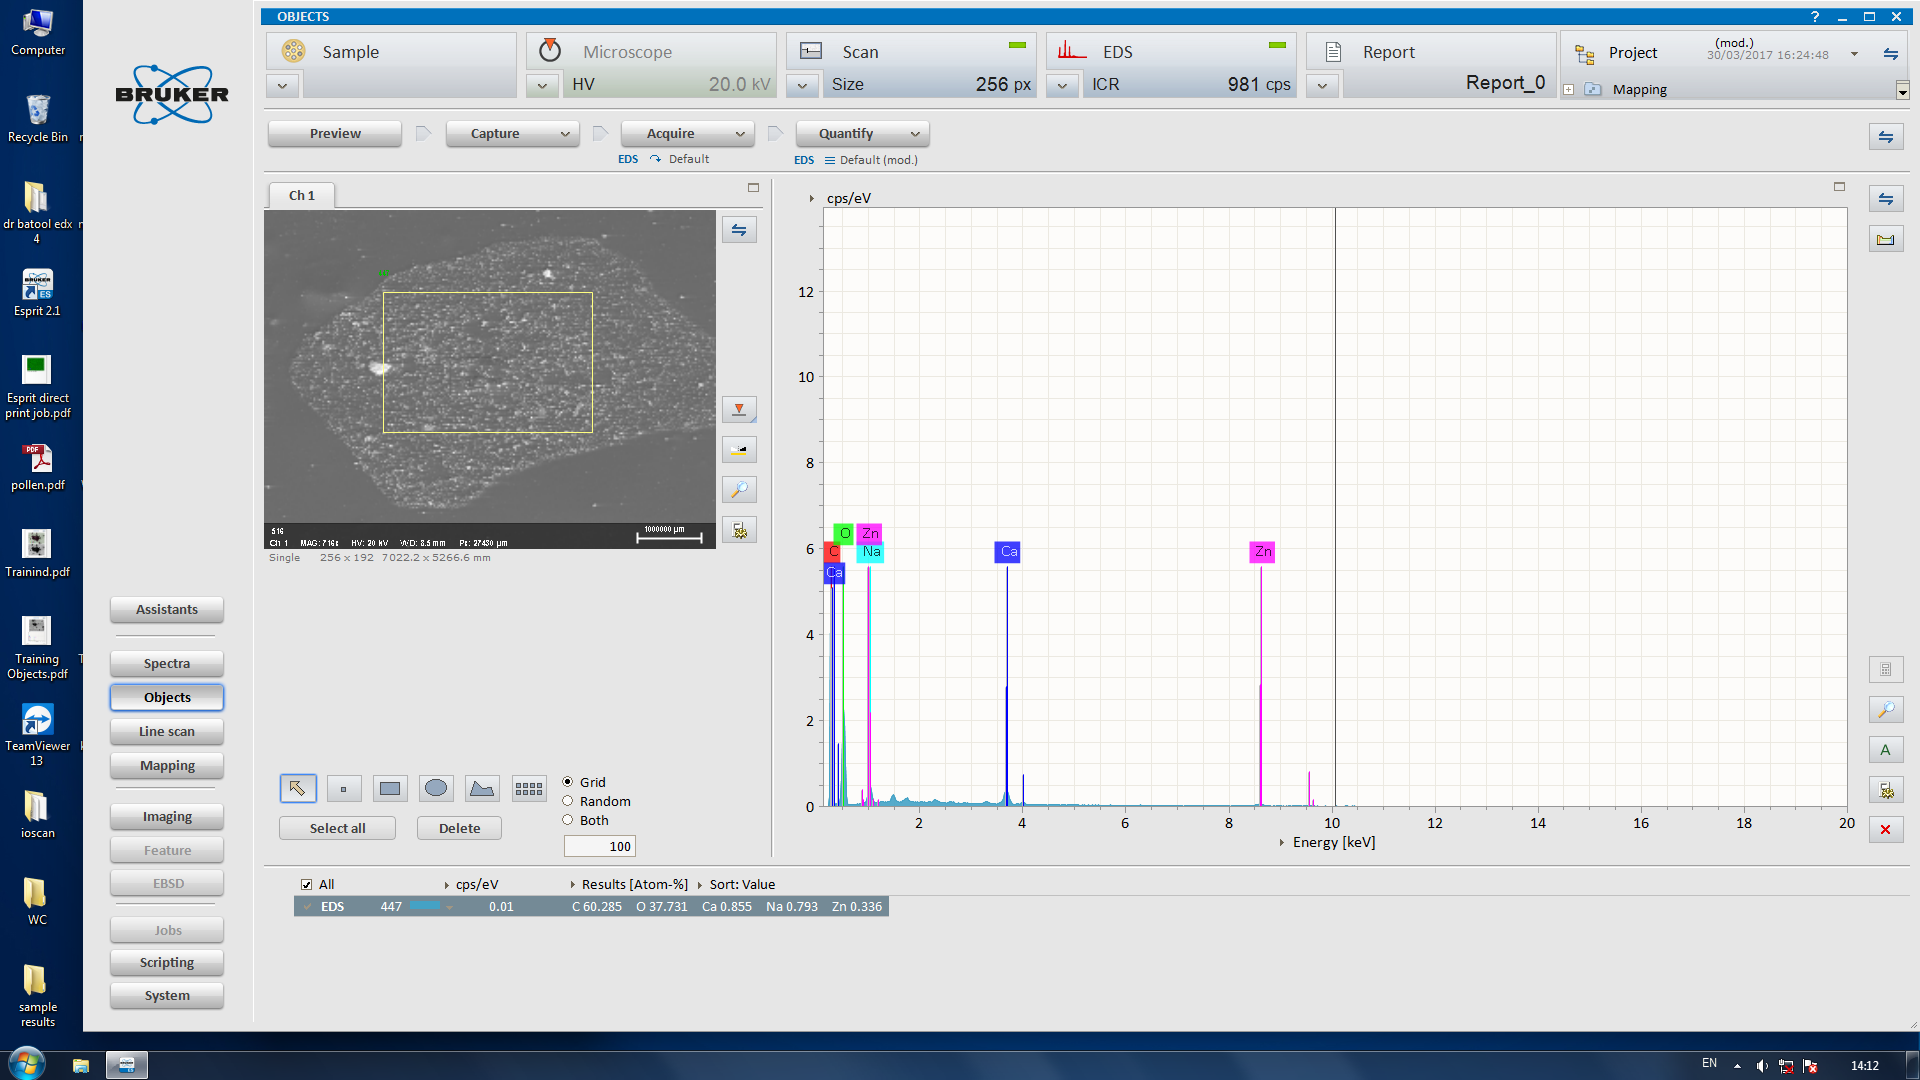


**Figure S5.** EDX of 1% lignin mediated ZnO NPs GTR membrane.
